# Numerical investigation of flow characteristics over stepped spillways

Aytaç Güven and Ahmed Hussein Mahmood

## ABSTRACT

Spillways are constructed to evacuate flood discharge safely so that a flood wave does not overtop the dam body. There are different types of spillways, with the ogee type being the conventional one. A stepped spillway is an example of a nonconventional spillway. The turbulent flow over a stepped spillway was studied numerically by using the Flow-3D package. Different fluid flow characteristics such as longitudinal flow velocity, temperature distribution, density and chemical concentration can be well simulated by Flow-3D. In this study, the influence of slope changes on flow characteristics such as air entrainment, velocity distribution and dynamic pressures distribution over a stepped spillway was modelled by Flow-3D. The results from the numerical model were compared with an experimental study done by others in the literature. Two models of a stepped spillway with different discharge for each model were simulated. The turbulent flow in the experimental model was simulated by the Renormalized Group (RNG) turbulence scheme in the numerical model. A good agreement was achieved between the numerical results and the observed ones, which are exhibited in terms of graphics and statistical tables.

**Key words** | CFD, numerical modelling, slope change, stepped spillway, turbulent flow

**Aytaç Güven** (corresponding author)  
**Ahmed Hussein Mahmood**  
Civil Engineering Department,  
Gaziantep University,  
Gaziantep,  
Turkey  
E-mail: [aguven@gantep.edu.tr](mailto:aguven@gantep.edu.tr)

## HIGHLIGHTS

- A numerical model was developed for stepped spillways.
- The turbulent flow was simulated by the Renormalized Group (RNG) model.
- Both numerical and experimental results showed that flow characteristics are greatly affected by abrupt slope change on the steps.

## INTRODUCTION

Dam structures are the most important projects around the world to store water or to transport water because protection of water is the key to living. And the spillway is classified as one of the most important parts of a dam. A spillway is constructed to protect a dam from destruction or damage by flood. Dam building and flood control can be considered a very important issue across the world given the importance

of hydroelectric power generation, navigation, recreation and fishing. There are many types of spillway, but the most common types are: ogee spillways, free over-fall spillways, siphon spillways, chute spillways, side channel spillways, tunnel spillways, shaft spillways and stepped spillways. And every spillway consists of four necessary components: an inlet channel, control structure, discharge carrier and outlet channel. A large number of stepped spillways were constructed through the recent decades, as especially associated with the technique of roller compacted concrete (RCC) dam construction and construction of stepped

This is an Open Access article distributed under the terms of the Creative Commons Attribution Licence (CC BY 4.0), which permits copying, adaptation and redistribution, provided the original work is properly cited (<http://creativecommons.org/licenses/by/4.0/>).

doi: 10.2166/ws.2020.283

spillways classified as an easier, quicker and cheaper technique of construction (Chanson 2002; Felder & Chanson 2011). A stepped spillway structure increases the rate of energy dissipation which decreases cavitation risk (Boes & Hager 2003b). And stepped spillways have advantages which make them more attractive under various conditions.

The flow behaviour in stepped spillways is generally classified by three different regimes: nappe, transition and skimming flow regimes (Chanson 2002). When the flow rate is low the nappe flow regime occurs and it is characterized as a sequence of free-falling nappes, while in a skimming flow regime, water flows over steps as a coherent stream on the pseudo-bottom above the outer step edges. It is also clear that under the main flow three-dimensional recirculating vortices occur (e.g., Chanson 2002; Gonzalez & Chanson 2008). At the pseudo-bottom near the step edge the direction of the flow is virtually aligned with the pseudo-bottom. According to Takahashi & Ohtsu (2012), for a given flow rate in a skimming flow regime the flow impacts the horizontal step face near the step edge and, with a decreasing chute slope, the area of the impact region will increase. Transition flow regime occurs between the nappe flow and skimming flow regime. In design of stepped spillways, the skimming flow regime should be considered (e.g., Chanson 1994; Matos 2000; Chanson 2002; Boes & Hager 2003a).

Computational fluid dynamics (CFD), namely numerical models of hydraulic engineering, generally reduce the amount of total cost and time that will be spent on physical models. So numerical models are classified as faster and cheaper than experimental models and can also be used for more than one purpose at the same time. There are many CFD software packages available but the most widely used one is Flow-3D. In this study, Flow 3D software is used to simulate the air concentration, velocity distribution and dynamic pressure distribution on a stepped spillway for two different models with different flow rates.

Roshan *et al.* (2010) studied the investigation of flow regimes and energy dissipation over two physical models of stepped spillways with different numbers of steps and discharges. The slope of the experimental models was 19.2% and the number of steps 12 and 23, respectively. The results illustrated that the observed flow regimes in the 23-step physical model was considered more acceptable than the 12-step model. However, the energy dissipation on the

12-step model was more than on the 23-step model. And the experiments observed that in the skimming flow regime the energy dissipation in the 23-step model was less than in the 12-step model by about 12%.

Ghaderi *et al.* (2020a) carried out experimental studies of stepped spillways to investigate the influence of scouring parameters with different step sizes and flow rates. The results showed that the flow regime affected the scour-hole dimensions, such as the minimum scouring depth which happened under the nappe flow regime. Moreover, the tailwater depth and step size are actual parameters for maximum scouring depth. By increasing the depth of tailwater from 6.31 cm to 8.54 and 11.82 cm this increased the scouring depth by 18.56% and 11.42% respectively. Also, this increasing tailwater depth decreases the scouring length by 31.43% and 16.55% respectively. In addition, the Froude number increases by increasing the flow rate, and the increased momentum of the flow promotes scouring. Also, the results indicated that the scouring in the middle is less than at the sidewalls of the cross-section. An empirical formula was suggested to predict the maximum depth of scouring downstream of stepped spillways and then compared with the experimental results. And the comparison illustrated that the suggested formula can predict the depth of scouring within 3.86% and 9.31% relative and maximum errors, respectively.

Ghaderi *et al.* (2020b) made a numerical investigation of trapezoidal labyrinth shaped (TLS) steps. The results observed that these types of spillways have better performance because they increase the magnification ratio  $L_T/W_t$  ( $L_T$  is the total edge length,  $W_t$  is the width of spillway). Also, the trapezoidal labyrinth shaped stepped spillway has a larger friction factor and a lower residual head. The friction factor differs from 0.79 to 1.33 for various magnification ratios, while for the flat stepped spillway it is approximately equal to 0.66. Also, the ratio of the residual head ( $H_{res}/dc$ ) is approximately 2.89 in a TLS stepped spillway, while it is approximately equal to 4.32 for a flat stepped spillway.

Shahheydari *et al.* (2015) investigated the flow over a stepped spillway in skimming flow regime by using Flow-3D software, the RNG  $k-\epsilon$  model and Volume of Fluid (VOF) method to study the profiles of free surface flow such as discharge coefficient and energy dissipation and compared them with the experimental results. The results showed that the relationship between the energy dissipation rate and

discharge coefficient rate was inverse, and were in good agreement with the results from the experimental model.

Mohammad Rezapour Tabari & Tavakoli (2016) investigated the effect of various parameters such as step height (h), step length (L), number of steps (Ns) and the discharge in unit width (q) on the energy dissipation in a stepped spillway. They used Flow-3D software in the analysis to evaluate the relationship between the energy loss and the critical depth of flow in a stepped spillway. Moreover, the finite volume method was applied to solve the equations and the standard k-ε model used for flow turbulence. According to the results, the energy dissipation decreases when the number of steps increases and the flow discharge increases. The gained results were compared with other studies, empirical and mathematical investigations were conducted, and eventually passable results were acquired.

## METHODOLOGY

For all numerical models the basic principle is very similar: a set of partial differential equations (PDE) present the physical problems. The flow of fluids (gas and liquid) are governed by the conservation laws of mass, momentum and energy. For Computational Fluid Dynamics (CFD), the PDE system is substituted by a set of algebraic equations which can be worked out by using numerical methods (Versteeg & Malalasekera 2007). Flow-3D uses the finite volume approach to solve the Reynolds Averaged Navier-Stokes (RANS) equation, by applying the technique of Fractional Area/Volume Obstacle Representation (FAVOR) to define an obstacle (Flow Science Inc. 2012). Equations (1) and (2) are RANS and continuity equations with FAVOR variables that are applied for incompressible flows.

$$\frac{\partial}{\partial X_i} (u_i A_i) = 0 \quad (1)$$

$$\frac{\partial u_i}{\partial t} + \frac{1}{V_F} \left( u_j A_j \frac{\partial u_i}{\partial x_j} \right) = \frac{1}{\rho} \frac{\partial p}{\partial x_i} + g_i + f_i \quad (2)$$

where  $u_i$  is the velocity in  $x_i$  direction,  $t$  is the time,  $A_i$  is the fractional area open to flow in the subscript directions,  $V_F$  is the volume fraction of fluid in each cell,  $p$  is the hydrostatic pressure,  $\rho$  is the density,  $g_i$  is the

gravitational force in subscript directions and  $f_i$  is the Reynolds stresses.

Turbulence modelling is one of three key elements in CFD (Gunal 1996). There are many types of turbulence models, but the most common are Zero-equation models, One-equation models, Two-equation models, Reynolds Stress/Flux models and Algebraic Stress/Flux models. In FLOW-3D software, five turbulence models are available. The formulation used in the FLOW-3D software differs slightly from other formulations that includes the influence of the fractional areas/volumes of the FAVOR<sup>TM</sup> method and generalizes the turbulence production (or decay) associated with buoyancy forces. The latter generalization, for example, includes buoyancy effects associated with non-inertial accelerations.

The available turbulence models in Flow-3D software are the Prandtl Mixing Length Model, the One-Equation Turbulent Energy Model, the Two-Equation Standard k – ε Model, the Two-Equation Renormalization-Group (RNG) Model and large Eddy Simulation Model (Flow Science Inc. 2012).

In this research the RNG model was selected because this model is more commonly used than other models in dealing with particles; moreover, it is more accurate to work with air entrainment and other particles. In general, the RNG model is classified as a more widely-used application than the standard k-ε model. And in particular, the RNG model is more accurate in flows that have strong shear regions than the standard k-ε model and it is defined to describe low intensity turbulent flows. For the turbulent dissipation  $\varepsilon_T$  it solves an additional transport equation:

$$\begin{aligned} \frac{\partial \varepsilon_T}{\partial t} + \frac{1}{V_F} \left( u A_x \frac{\partial \varepsilon_T}{\partial x} + v A_y R \frac{\partial \varepsilon_T}{\partial y} + w A_z \frac{\partial \varepsilon_T}{\partial z} \right) \\ = \frac{CDIS1 \cdot \varepsilon_T}{k_T} (P_{T+CDIS3.G_T}) + \text{Diff } \varepsilon - CDIS2 \frac{\varepsilon_T^2}{k_T} \end{aligned} \quad (3)$$

where CDIS1, CDIS2, and CDIS3 are dimensionless parameters and the user can modify them. The diffusion of dissipation, Diff  $\varepsilon$ , is

$$\begin{aligned} \text{Diff } \varepsilon = \frac{1}{V_F} \left\{ \frac{\partial}{\partial x} \left( v_e A_x \frac{\partial \varepsilon_T}{\partial x} \right) + R \frac{\partial}{\partial y} \left( v_e A_y R \frac{\partial \varepsilon_T}{\partial y} \right) \right. \\ \left. + \frac{\partial}{\partial z} \left( v_e A_z \frac{\partial \varepsilon_T}{\partial z} \right) + \xi \frac{v_e A_x \varepsilon_T}{x} \right\} \end{aligned} \quad (4)$$

where  $u$ ,  $v$  and  $w$  are the x, y and z coordinates of the fluid velocity;  $A_x$ ,  $A_y$ ,  $A_z$  and  $V_F$ , are FLOW-3D's FAVOR<sup>TM</sup> defined terms;  $P_T$  and  $G_T$  are turbulence due to shearing and buoyancy effects, respectively.  $R$  and  $\xi$  are related to the cylindrical coordinate system. The default values of RMTKE, CDIS1 and CNU differ, being 1.39, 1.42 and 0.085 respectively. And CDIS2 is calculated from turbulent production ( $P_T$ ) and turbulent kinetic energy ( $k_T$ ).

The kinematic turbulent viscosity is the same in all turbulence transport models and is calculated from

$$v_T = CNU \frac{k_T^2}{\varepsilon_T} \quad (5)$$

where  $v_T$ : is the turbulent kinematic viscosity.  $\varepsilon_T$  is defined as the numerical challenge between the RNG and the two-equation k- $\varepsilon$  models, found in the equation below. To avoid an unphysically large result for  $v_T$  in Equation (3), since this equation could produce a value for  $\varepsilon_T$  very close to zero and also because the physical value of  $k_T$  may approach to zero in such cases, the value of  $\varepsilon_T$  is calculated from the following equation:

$$\varepsilon_{T, \min} = CNU \sqrt{\frac{3}{2}} \frac{k_T^{\frac{3}{2}}}{TLEN} \quad (6)$$

where  $TLEN$ : the turbulent length scale.

VOF and FAVOR are classifications of volume-fraction methods. In these two methods, firstly the area should be subdivided into a control volume grid or a small element. Each flow parameter like velocity, temperature and pressure values within the element are computed for each element containing liquids. Generally, these values represent the volumetric average of values in the elements.

Numerous methods have been used recently to solve free infinite boundaries in the various numerical simulations. VOF is an easy and powerful method created based on the concept of a fractional intensity of fluid. A significant number of studies have confirmed that this method is more flexible and efficient than others dealing with the configurations of a complex free boundary. By using VOF technology the Flow-3D free surface was modelled and first declared in [Hirt & Nichols \(1981\)](#). In the VOF method

there are three ingredients: a planner to define the surface, an algorithm for tracking the surface as a net mediator moving over a computational grid, and application of the boundary conditions to the surface. Configurations of the fluids are defined in terms of VOF function,  $F(x, y, z, t)$  ([Hirt & Nichols 1981](#)). And this VOF function shows the volume of flow per unit volume

$$\frac{\partial F}{\partial t} + \frac{1}{V_F} \left[ \frac{\partial}{\partial x}(FA_{xu}) + R \frac{\partial}{\partial y}(FA_{yv}) + \frac{\partial}{\partial z}(FA_{zw}) + \xi \frac{FA_{xu}}{x} \right] = F_{DIF} + F_{SOR} \quad (7)$$

$$F_{DIF} = \frac{1}{V_F} \left\{ \frac{\partial}{\partial x} \left( v_F A_x \frac{\partial F}{\partial x} \right) + R \frac{\partial}{\partial x} \left( v_F A_y R \frac{\partial F}{\partial y} \right) + \frac{\partial}{\partial z} \left( v_F A_z \frac{\partial F}{\partial z} \right) + \xi \frac{v_F A_x F}{x} \right\} \quad (8)$$

$$V_F \frac{\partial \rho}{\partial t} + \frac{\partial}{\partial x}(\rho u A_x) + R \frac{\partial}{\partial y}(\rho v A_y) + \frac{\partial}{\partial z}(\rho w A_z) + \xi \frac{\rho u A_x}{x} = R_{DIF} + R_{SOR} \quad (9)$$

where  $\rho$  is the density of the fluid,  $R_{DIF}$  is a turbulent diffusion term,  $R_{SOR}$  is a mass source,  $V_F$  is the fractional volume open to flow. The components of velocity ( $u, v, w$ ) are in the direction of coordinates ( $x, y, z$ ) or ( $r, R_{SOR}, z$ ).  $A_x$  in the x-direction is the fractional area open to flow,  $A_y$  and  $A_z$  are identical area fractions for flow in the y and z directions. The R coefficient is based on the selection of the coordinate system.

The FAVOR method is a different method and uses another volume fraction technique, which is only used to define the geometry, such as the volume of liquid in each cell used to determine the position of fluid surfaces. Another fractional volume can be used to define the solid surface. Then, this information is used to determine the boundary conditions of the wall that the flow should be adapted for.

## Case study

In this study, the experimental results of [Ostad Mirza \(2016\)](#) was simulated. In a channel composed of two 4 m long modules, with a transparent sidewall of height 0.6 m and 0.5 m width. The upstream chute slope (i.e. pseudo-bottom angle)  $\Theta_1 = 50^\circ$ , the downstream chute slope  $\Theta_2 = 30^\circ$  or  $18.6^\circ$ , the step heights  $h = 0.06$  m, the total number of

steps along the 50° chute 41 steps, the total number of steps along the 30° chute 34 steps and the total number of steps along the 18.6° chute 20 steps.

The flume inflow tool contained a jetbox with a maximum opening set to 0.12 meters, designed for passing the maximum unit discharge of 0.48 m<sup>2</sup>/s. The measurements of the flow properties (i.e. air concentration and velocity) were computed perpendicular to the pseudo-bottom as shown in Figure 1 at the centre of twenty stream-wise cross-sections, along the stepped chute, (i.e. in five steps up on the slope change and fifteen steps down on the slope change, namely from step number -09 to +23 on 50°-30° slope change, or from -09 to +15 on 50°-18.6° slope change, respectively).

Pressure sensors were arranged with the  $x/l$  values for different slope change as shown in Table 1, where  $x$  is the distance from the step edge, along the horizontal step face, and  $l$  is the length of the horizontal step face. The location of pressure sensors is shown in Table 1.

### Numerical model set-up

A 3D numerical model of hydraulic phenomena was simulated based on an experimental study by Ostad Mirza (2016). The water surcharge and flow pressure over the

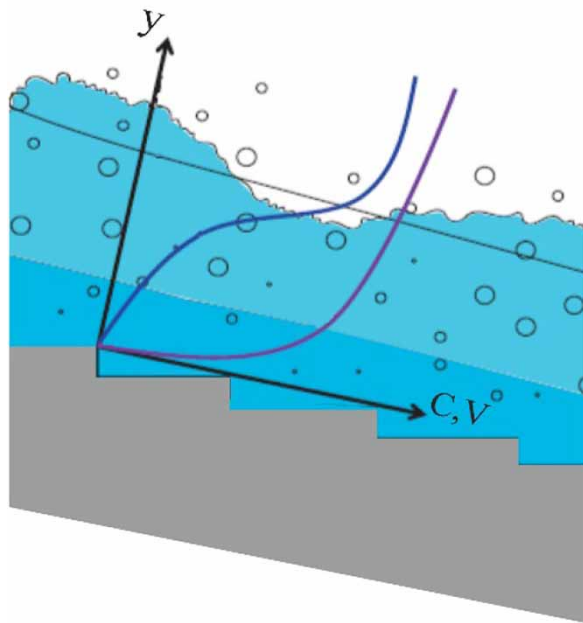

**Figure 1** | Sketch of the air concentration  $C$  and velocity  $V$  measured perpendicular to the pseudo-bottom used by Mirza (Ostad Mirza 2016).

**Table 1** | Location of pressure sensors on horizontal step faces

| $\theta(^{\circ})$ | $L(m)$ | $x/l (-)$ |      |      |     |      |
|--------------------|--------|-----------|------|------|-----|------|
| 50.0               | 0.050  | 0.35      | 0.64 | -    | -   | -    |
| 30.0               | 0.104  | 0.17      | 0.50 | 0.84 | -   | -    |
| 18.6               | 0.178  | 0.10      | 0.30 | 0.50 | 0.7 | 0.88 |

stepped spillway was computed for two models of a stepped spillway with different discharge for each model. In this study, the package was used to simulate the flow parameters such as air entrainment, velocity distribution and dynamic pressures. The solver uses the finite volume technique to discretize the computational domain. In every test run, one incompressible fluid flow with a free surface flow selected at 20° was used for this simulation model. Table 2 shows the variables used in test runs.

For stepped spillway simulation, several parameters should be specified to get accurate simulations, which is the scope of this research. Viscosity and turbulent, gravity and non-inertial reference frame, air entrainment, density evaluation and drift-flux should be activated for these simulations. There are five different choices in the 'viscosity and turbulent' option, in the viscosity flow and Renormalized Group (RNG) model. Then a dynamical model is selected as the second option, the 'gravity and non-inertial reference frame'. Only the  $z$ -component was inputted as a negative 9.81 m/s<sup>2</sup> and this value represents gravitational acceleration but in the same option the  $x$  and  $y$  components will be zero. Air entrainment is selected. Finally, in the drift-flux model, the density of phase one is input as (water) 1,000 kg/m<sup>3</sup> and the density of phase two (air) as 1.225 kg/m<sup>3</sup>. Minimum volume fraction of phase one is input equal to 0.1 and maximum volume fraction of phase two to 1 to allow air concentration to reach 90%, then the option allowing gas to escape at free surface is selected, to obtain closer simulation.

**Table 2** | Variables used in test runs

| Test no. | $\theta_1 (^{\circ})$ | $\theta_2 (^{\circ})$ | $h(m)$ | $d_0$ | $q (m^3s^{-1})$ | $d_c/h (-)$ |
|----------|-----------------------|-----------------------|--------|-------|-----------------|-------------|
| 1        | 50                    | 18.6                  | 0.06   | 0.045 | 0.1             | 2.6         |
| 2        | 50                    | 18.6                  | 0.06   | 0.082 | 0.235           | 4.6         |
| 3        | 50                    | 30.0                  | 0.06   | 0.045 | 0.1             | 2.6         |
| 4        | 50                    | 30.0                  | 0.06   | 0.082 | 0.235           | 4.6         |



The flow domain is divided into small regions relatively by the mesh in Flow-3D numerical model. Cells are the smallest part of the mesh, in which flow characteristics such as air concentration, velocity and dynamic pressure are calculated. The accuracy of the results and simulation time depends directly on the mesh block size so the cell size is very important. Orthogonal mesh was used in cartesian coordinate systems. A smaller cell size provides more accuracy for results, so we reduced the number of cells whilst including enough accuracy. In this study, the size of cells in x, y and z directions was selected as 0.015 m after several trials.

Figure 3 shows the 3D computational domain model 50–18.6 slope change, that is 6.0 m length, 0.50 m width and 4.23 m height. The 3D model of the computational domain model 50–30 slope changes this to 6.0 m length, 0.50 m width and 5.068 m height and the size of meshes in x, y, and z directions are 0.015 m. For the 50–18.6 slope change model: both total number of active and passive cells = 4,009,952, total number of active cells = 3,352,307, include real cells (used for solving the flow equations) =

3,316,269, open real cells = 3,316,269, fully blocked real cells equal to zero, external boundary cells were 36,038, inter-block boundary cells = 0 (Flow-3D report). For 50–30 slope change model: both total number of active and passive cells = 4,760,002, total number of active cells equal to 4,272,109, including real cells (used for solving the flow equations) were 3,990,878, open real cells = 3,990,878 fully blocked real cells = zero, external boundary cells were 281,231, inter-block boundary cells = 0 (Flow-3D report).

When solving the Navier-Stokes equation and continuous equations, boundary conditions should be applied. The most important work of boundary conditions is to create flow conditions similar to physical status. The Flow-3D software has many types of boundary condition; each type can be used for the specific condition of the models. The boundary conditions in Flow-3D are symmetry, continuative, specific pressure, grid overlay, wave, wall, periodic, specific velocity, outflow, and volume flow rate.

There are two options to input finite flow rate in the Flow-3D software either for inlet discharge of the system or for the outlet discharge of the domain: specified velocity and volume flow rate. In this research, the X-minimum boundary condition, volume flow rate, has been chosen. For X-maximum boundary condition, outflow was selected because there is nothing to be calculated at the end of the flume. The volume flow rate and the elevation of surface water was set for  $Q=0.1$  and  $0.235 \text{ m}^3/\text{s}$  respectively (Figure 2).

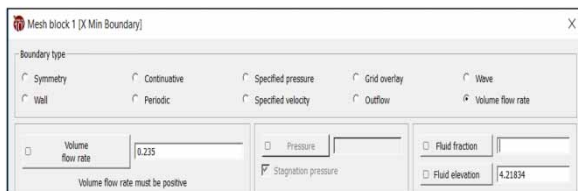

Figure 2 | Inlet boundary condition for  $Q=0.235 \text{ m}^3/\text{s}$  and fluid elevation 4.21834 m.

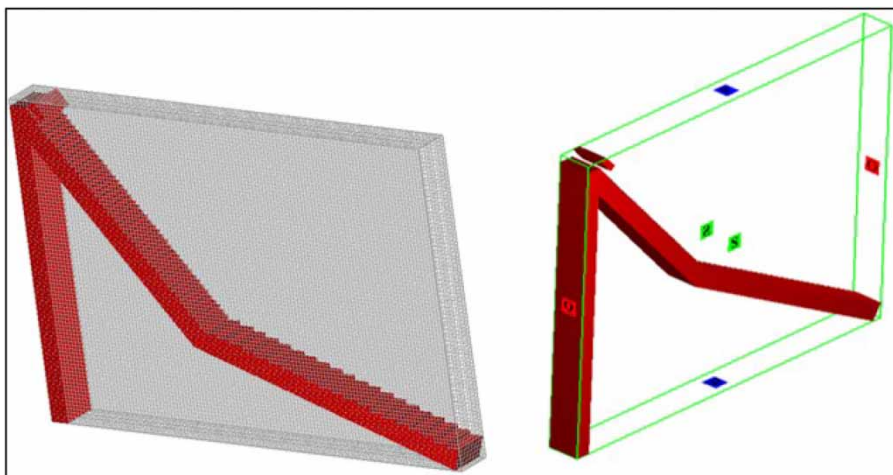

Figure 3 | The 3D computational domain model (50–18.6) slope change, and boundary condition for (50–30 slope change) model.

The bottom (Z-min) is prepared as a wall boundary condition and the top (Z-max) is computed as a pressure boundary condition, and for both (Y-min) and (Y-max) as symmetry.

## RESULTS AND DISCUSSION

The air concentration distribution profiles in two models of stepped spillway were obtained at an acquisition time equal to 25 seconds in skimming flow for both upstream and downstream of a slope change  $50^\circ$ - $18.6^\circ$  and  $50^\circ$ - $30^\circ$  for different discharge as in Table 2, and as shown in Figure 4 for  $50^\circ$ - $18.6^\circ$  slope change and Figure 5 for  $50^\circ$ - $30^\circ$  slope change configuration for  $d_c/h = 4.6$ . The simulation results of the air concentration are very close to the experimental results in all curves and fairly close to that predicted by the advection-diffusion model for the air bubbles suggested by Chanson (1997) on a constant sloping chute.

But as is shown in all above mentioned figures it is clear that at the pseudo-bottom the CFD results of air concentration are less than experimental ones until the depth of

water reaches a quarter of the total depth of water. Also the direction of the curves are parallel to each other when going up towards the surface water and are incorporated approximately near the surface water. For all curves, the cross-section is separate between upstream and downstream steps. Therefore the (-) sign for steps represents a step upstream of the slope change cross-section and the (+) sign represents a step downstream of the slope change cross-section.

The dimensionless velocity distribution ( $V/V_{90}$ ) profile was acquired at an acquisition time equal to 25 seconds in skimming flow of the upstream and downstream slope change for both  $50^\circ$ - $18.6^\circ$  and  $50^\circ$ - $30^\circ$  slope change. The simulation results are compared with the experimental ones showing that for all curves there is close similarity for each point between the observed and experimental results. The curves increase parallel to each other and they merge near at the surface water as shown in Figure 6 for slope change  $50^\circ$ - $18.6^\circ$  configuration and Figure 7 for slope change  $50^\circ$ - $30^\circ$  configuration. However, at step numbers +1 and +5 in Figure 7 there are few differences between the simulated and observed results, namely the

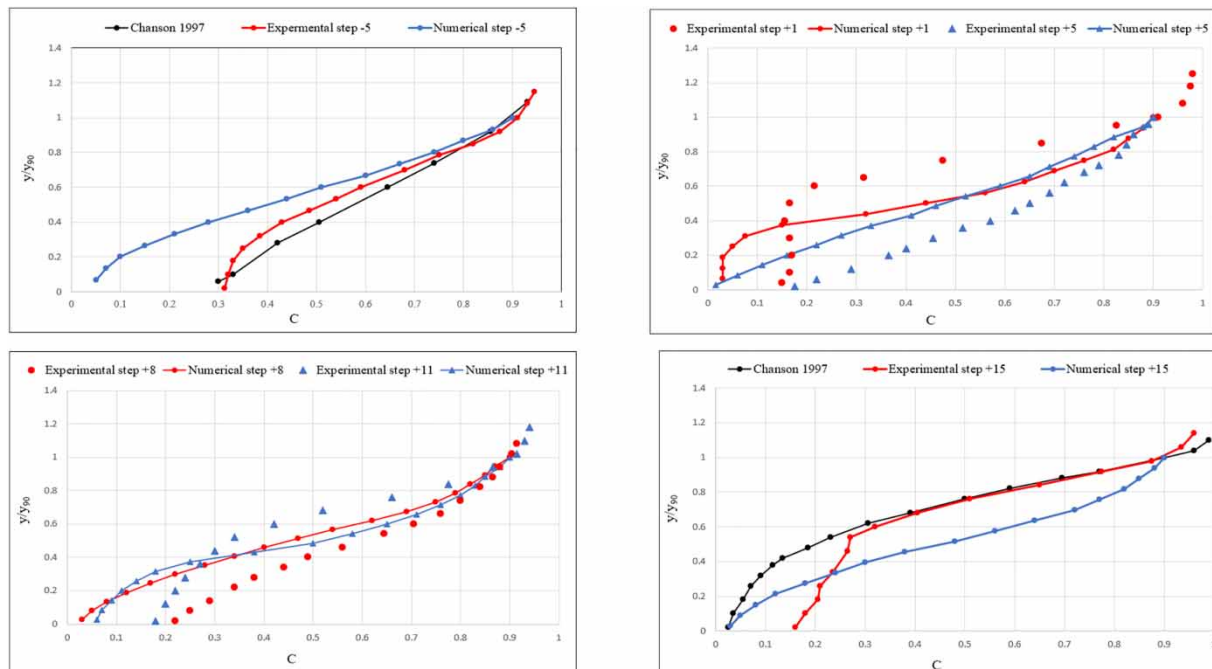

Figure 4 | Experimental and simulated air concentration distribution for steps number -5, +1, +5, +8, +11 and +15 along the  $50^\circ$ - $18.6^\circ$  slope change for  $d_c/h = 4.6$ .

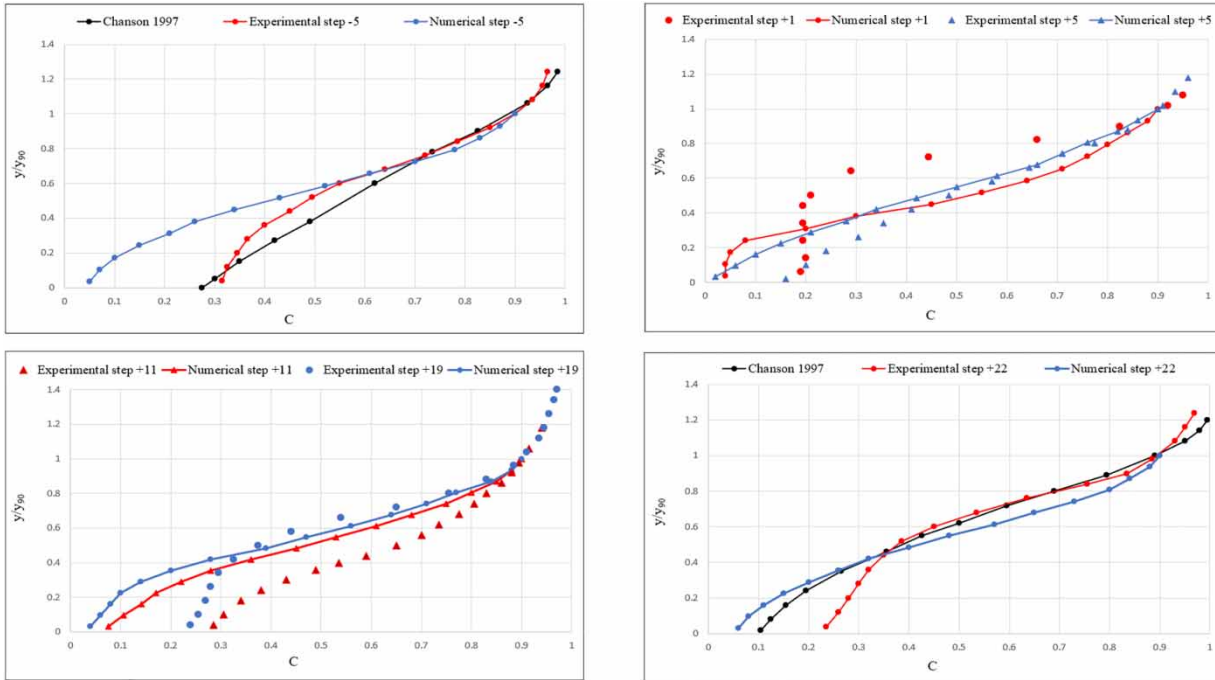

Figure 5 | Experimental and simulated air concentration distribution for steps number -5, +1, +5, +11, +19 and +22 along the  $50^\circ$ - $30^\circ$  slope change, for  $d_c/h = 4.6$ .

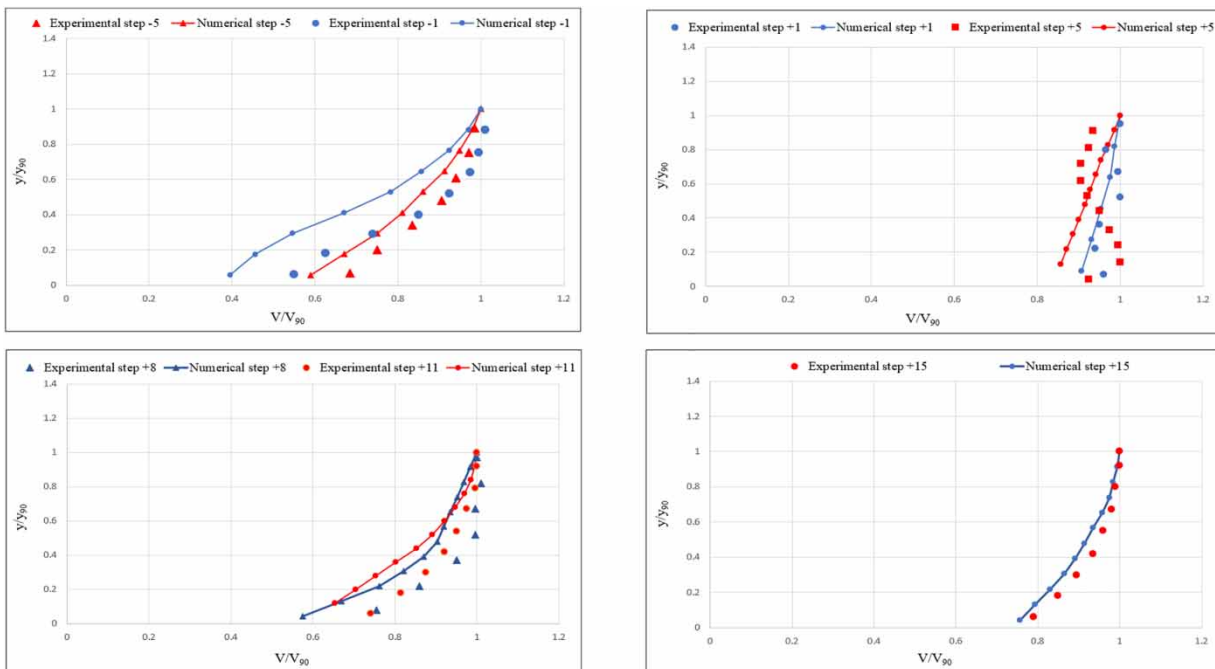

Figure 6 | Experimental and simulated dimensionless velocity distribution for steps number -5, -1, +1, +5, +8, +11 and +15 along the  $50^\circ$ - $18.6^\circ$  slope change for  $d_c/h = 2.6$ .



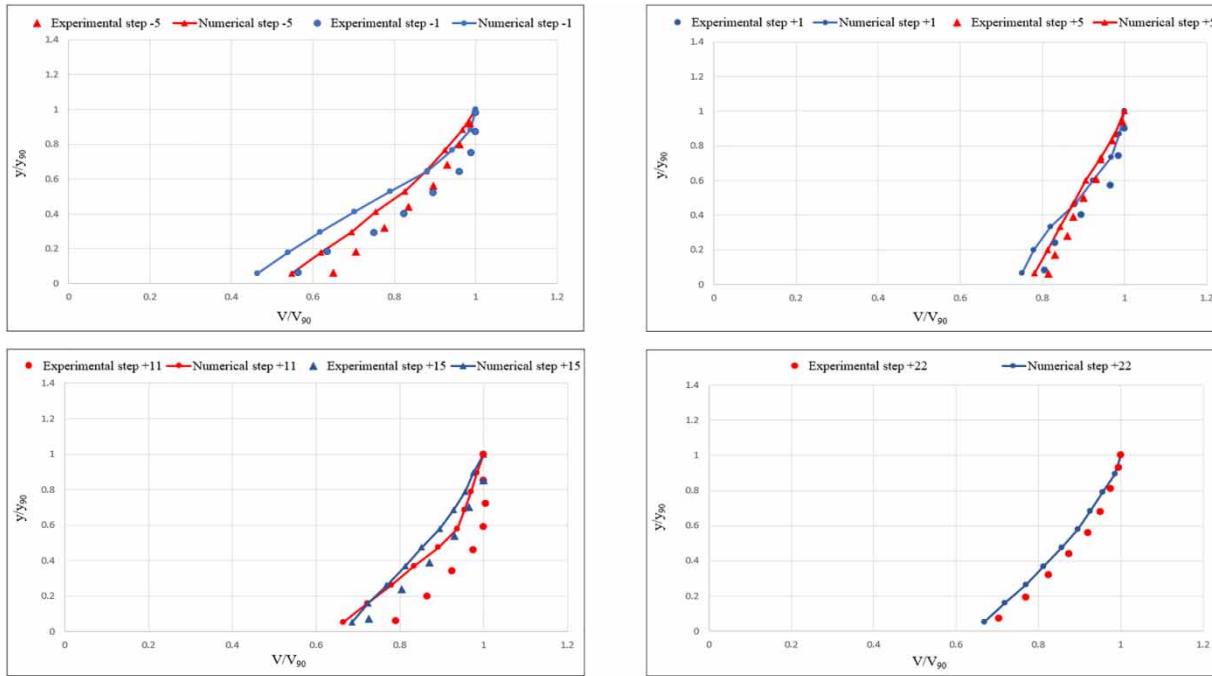

**Figure 7** | Experimental and simulated dimensionless velocity distribution for steps number  $-5$ ,  $-1$ ,  $+1$ ,  $+5$ ,  $+11$ ,  $+15$  and  $+22$  along the  $50^\circ$ - $30^\circ$  slope change for  $dc/h = 2.6$ .

simulation curves ascend regularly meaning the velocity increases regularly from the pseudo-bottom up to the surface water.

Figure 8 ( $50^\circ$ - $18.6^\circ$  slope change) and Figure 9 ( $50^\circ$ - $30^\circ$  slope change) compare the simulation results and the experimental results for the presented dimensionless dynamic pressure distribution for different points on the stepped spillway. The results show a good agreement with the experimental and numerical simulations in all curves. For some

points, few discrepancies can be noted in pressure magnitudes between the simulated and the observed ones, but they are in the acceptable range. Although the experimental data do not completely agree with the simulated results, there is an overall agreement.

The pressure profiles were acquired at an acquisition time equal to 70 seconds in skimming flow on  $50^\circ$ - $18.6^\circ$ , where  $p$  is the measured dynamic pressure,  $h$  is step height and  $\gamma$  is water specific weight. A negative sign for steps

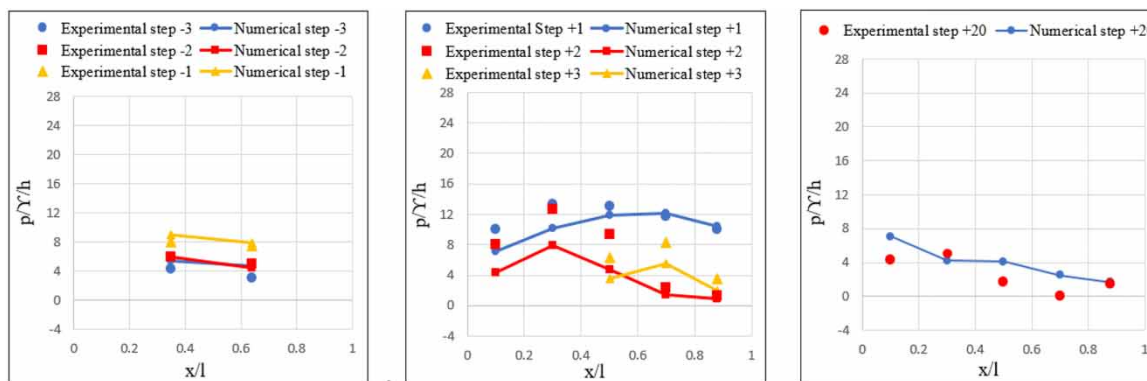

**Figure 8** | Comparison between simulated and experimental results for the dimensionless pressure for steps number  $-1$ ,  $-2$ ,  $-3$  and  $+1$ ,  $+2$ ,  $+3$  and  $+20$  on the horizontal step faces of  $50^\circ$ - $18.6^\circ$  slope change configuration, for  $dc/h = 4.6$ ,  $x$  is the distance from the step edge.

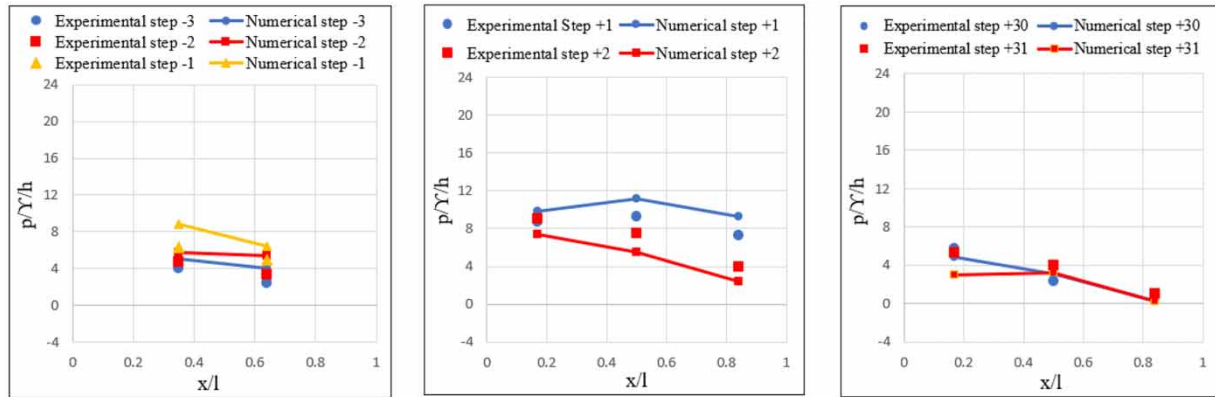

**Figure 9** | Comparison between simulated and experimental results for the dimensionless pressure for steps number -1, -2, -3 and +1, +2 and +30, +31 on the horizontal step face of 50°-30° slope change configuration, for  $dc/h = 4.6$ ,  $x$  is the distance from the step edge.

represents a step upstream of the slope change cross-section and a positive sign represents a step downstream of the slope change cross-section.

Figure 10 shows the experimental streamwise development of dimensionless pressure on the 50°-18.6° slope change for  $dc/h = 4.6$ ,  $x/l = 0.35$  on 50° sloping chute and  $x/l = 0.3$  on 18.6° sloping chute compared with the numerical simulation. It is obvious from Figure 10 that the streamwise development of dimensionless pressure before slope change (steps number -1, -2 and -3) both of the experimental and simulated results are close to each other. However, it is clear that there is a little difference between the results of the streamwise development of dimensionless

pressure at step numbers +1, +2 and +3. Moreover, from step number +3 to the end, the curves get close to each other.

Figure 11 compares the experimental and the numerical results for the streamwise development of the dimensionless pressure on the 50°-30° slope change, for  $dc/h = 4.6$ , and  $x/l = 0.35$  on 50° sloping chute and  $x/l = 0.17$  on 30° sloping chute. It is apparent that the outcomes of the experimental work are close to the numerical results, however, the results of the simulation are above the experimental ones before the slope change, but the results of the simulation descend below the experimental ones after the slope change till the end.

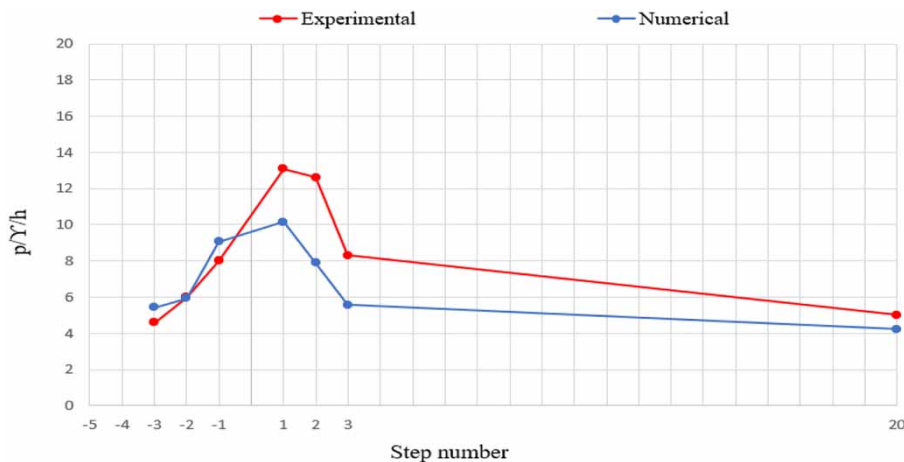

**Figure 10** | Comparison between experimental and simulated results for the streamwise development of the dimensionless pressure on the 50°-18.6° slope change, for  $dc/h = 4.6$ , and  $x/l = 0.35$  on 50° sloping chute and  $x/l = 0.3$  on 18.6° sloping chute.

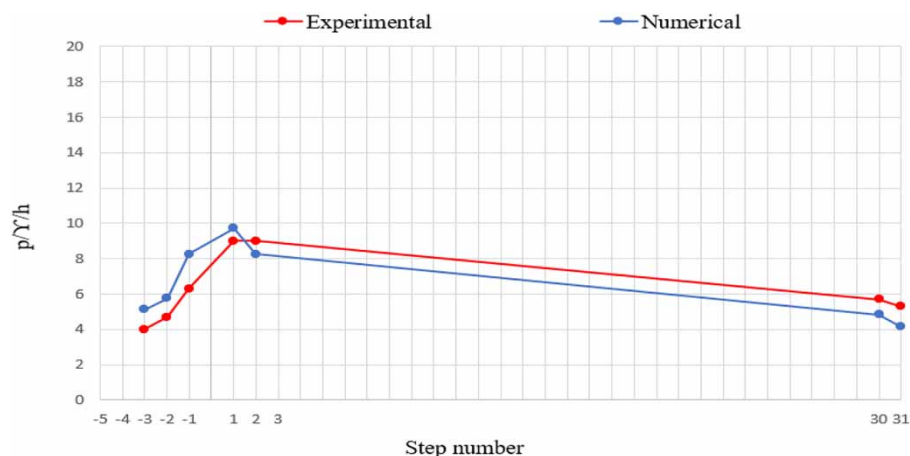

**Figure 11** | Comparison between experimental and simulated results for the streamwise development of the dimensionless pressure on the 50°–30° slope change, for  $dc/h = 4.6$ , and  $x/l = 0.35$  on 50° sloping chute and  $x/l = 0.17$  on 30° sloping chute.

## CONCLUSION

In this research, numerical modelling was attempted to investigate the effect of abrupt slope change on the flow properties (air entrainment, velocity distribution and dynamic pressure) over a stepped spillway with two different models and various flow rates in a skimming flow regime by using the CFD technique. The numerical model was verified and compared with the experimental results of [Ostad Mirza \(2016\)](#). The same domain of the numerical model was inputted as in experimental models to reduce errors as much as possible.

Flow-3D is a well modelled tool that deals with particles. In this research, the model deals well with air entrainment particles by observing their results with experimental results. And the reason for the small difference between the numerical and the experimental results is that the program deals with particles more accurately than the laboratory. In general, both numerical and experimental results showed that near to the slope change the flow bulking, air entrainment, velocity distribution and dynamic pressure are greatly affected by abrupt slope change on the steps. Although the extent of the slope change was relatively small, the influence of the slope change was major on flow characteristics.

The Renormalized Group (RNG) model was selected as a turbulence solver. For 3D modelling, orthogonal mesh was used as a computational domain and the mesh grid size used for X, Y, and Z direction was equal to 0.015 m. In CFD

modelling, air concentration and velocity distribution were recorded for a period of 25 seconds, but dynamic pressure was recorded for a period of 70 seconds. The results showed that there is a good agreement between the numerical and the physical models. So, it can be concluded that the proposed CFD model is very suitable for use in simulating and analysing the design of hydraulic structures.

## DATA AVAILABILITY STATEMENT

All relevant data are included in the paper or its Supplementary Information.

## REFERENCES

- Boes, R. M. & Hager, W. H. 2003a [Hydraulic design of stepped spillways](#). *Journal of Hydraulic Engineering* **129** (9), 671–679.
- Boes, R. M. & Hager, W. H. 2003b [Two-Phase flow characteristics of stepped spillways](#). *Journal of Hydraulic Engineering* **129** (9), 661–670.
- Chanson, H. 1994 [Hydraulics of skimming flows over stepped channels and spillways](#). *Journal of Hydraulic Research* **32** (3), 445–460.
- Chanson, H. 1997 *Air Bubble Entrainment in Free Surface Turbulent Shear Flows*. Academic Press, London.
- Chanson, H. 2002 *The Hydraulics of Stepped Chutes and Spillways*. Balkema, Lisse, The Netherlands.

- Felder, S. & Chanson, H. 2011 Energy dissipation down a stepped spillway with nonuniform step heights. *Journal of Hydraulic Engineering* **137** (11), 1543–1548.
- Flow Science, Inc. 2012 *FLOW-3D v10-1 User Manual*. Flow Science, Inc., Santa Fe, CA.
- Ghaderi, A., Daneshfaraz, R., Torabi, M., Abraham, J. & Azamathulla, H. M. 2020a Experimental investigation on effective scouring parameters downstream from stepped spillways. *Water Supply* **20** (5), 1988–1998.
- Ghaderi, A., Abbasi, S., Abraham, J. & Azamathulla, H. M. 2020b Efficiency of trapezoidal labyrinth shaped stepped spillways. *Flow Measurement and Instrumentation* **72**, 101711.
- Gonzalez, C. A. & Chanson, H. 2008 Turbulence and cavity recirculation in air-water skimming flows on a stepped spillway. *Journal of Hydraulic Research* **46** (1), 65–72.
- Gunal, M. 1996 *Numerical and Experimental Investigation of Hydraulic Jumps*. PhD Thesis, University of Manchester, Institute of Science and Technology, Manchester, UK.
- Hirt, C. W. & Nichols, B. D. 1981 Volume of fluid (VOF) method for the dynamics of free boundaries. *Journal of Computational Physics* **39** (1), 201–225.
- Matos, J. 2000 Hydraulic design of stepped spillways over RCC dams. In: *Intl Workshop on Hydraulics of Stepped Spillways* (H.-E. Minor & W. Hager, eds). Balkema Publ, Zurich, pp. 187–194.
- Mohammad Rezapour Tabari, M. & Tavakoli, S. 2016 Effects of stepped spillway geometry on flow pattern and energy dissipation. *Arabian Journal for Science & Engineering (Springer Science & Business Media BV)* **41** (4), 1215–1224.
- Ostad Mirza, M. J. 2016 Experimental Study on the Influence of Abrupt Slope Changes on Flow Characteristics Over Stepped Spillways. *Communications du Laboratoire de Constructions Hydrauliques*, No. 64 (A. J. Schleiss, ed.). Swiss Federal Institute of Technology Lausanne (EPFL), Lausanne, Switzerland.
- Roshan, R., Azamathulla, H. M., Marosi, M., Sarkardeh, H., Pahlavan, H. & Ab Ghani, A. 2010 Hydraulics of stepped spillways with different numbers of steps. *Dams and Reservoirs* **20** (3), 131–136.
- Shahheydari, H., Nodoshan, E. J., Barati, R. & Moghadam, M. A. 2015 Discharge coefficient and energy dissipation over stepped spillway under skimming flow regime. *KSCE Journal of Civil Engineering* **19** (4), 1174–1182.
- Takahashi, M. & Ohtsu, I. 2012 Aerated flow characteristics of skimming flow over stepped chutes. *Journal of Hydraulic Research* **50** (4), 427–434.
- Versteeg, H. K. & Malalasekera, W. 2007 *An Introduction to Computational Fluid Dynamics: The Finite Volume Method*. Pearson Education, Harlow.

First received 6 July 2020; accepted in revised form 11 October 2020. Available online 23 October 2020
